# Supplementary material
Source: PubMed Central journal article supplement (PMC5830127)

Figure 1. Distribution of D56 Chimerism- Each Individual Patient is Represented

A: Distributon of CD33 chimerism- B: Distribution of CD Chimerism

Figure 2.

- A. Cumulative Incidence of Relapse based on D56 UCB CD3 Chimerism AML-MDS
- B. Cumulative Incidence of Relapse based on D56 UCB CD33 Chimerism AML-MDS
- C. Progression Free Survival based on D56 UCB CD3 Chimerism- AML-MDS
- D. Progression Free Survival based on D56 UCB CD33 Chimerism- AML-MDS

Figure 3: Cumulative Incidence of Chronic GVHD

Supplemental Figure

- A. Course of UCB CD33 Chimerism in patients with imputed D56 chimerism
- B. Course of UCB CD3 Chimerism in patients with imputed D56 chimerism
  
- C. Relapse rates based on quartiles of CD3 chimerism: lowest quartile mixed , second quartile mixed chimerism and full CD3 chimerism
- D. Relapse rates based on quartiles of CD33 chimerism: lowest quartile mixed , second quartile mixed chimerism and full CD33 chimerism

Supplemental Figure A

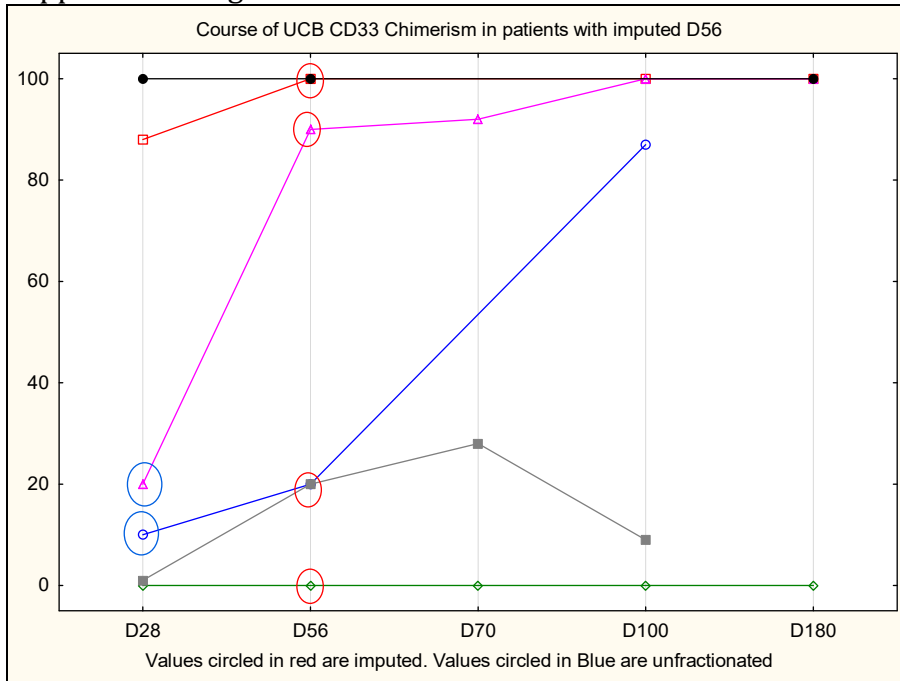

Supplemental Figure B

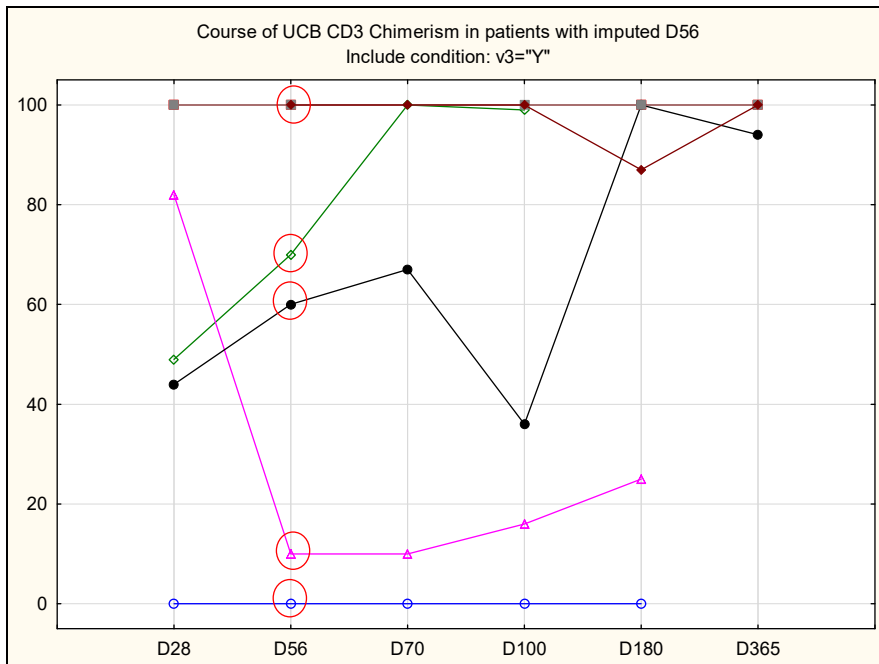

Supplemental Figure C

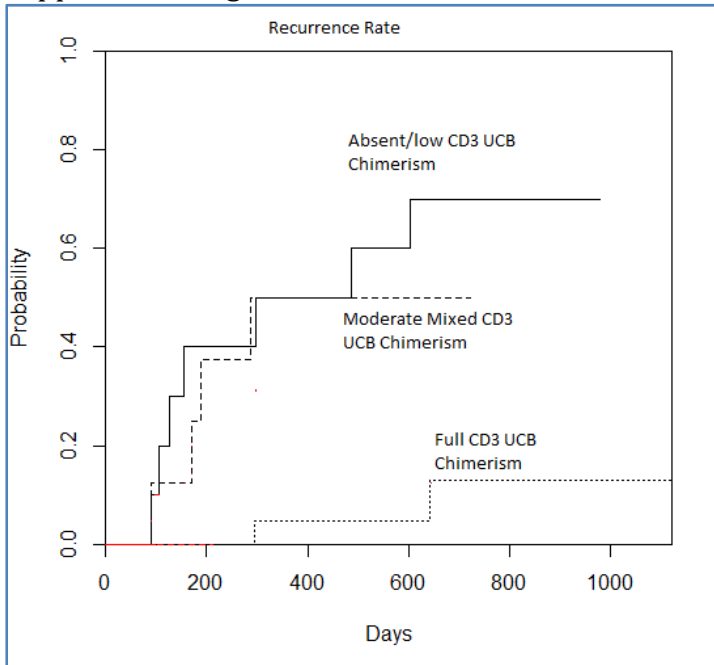

Supplemental Figure D

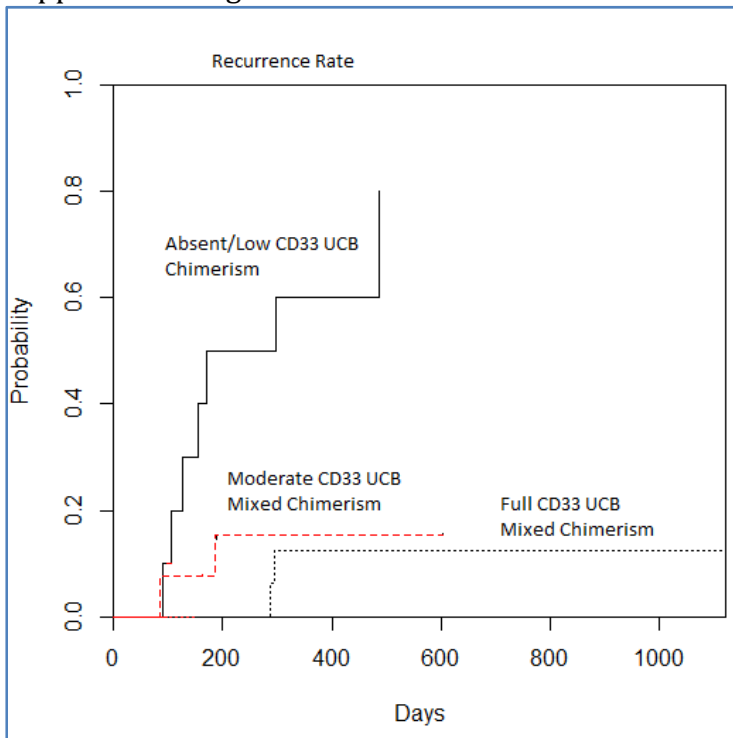

Supplement: NIHMS926287-supplement-supplement_1.pdf [file NIHMS926287-supplement-supplement_1.pdf]
